# Supplementary figures and images for: Systematical Characterization of the Cotton Di19 Gene Family and the Role of GhDi19-3 and GhDi19-4 as Two Negative Regulators in Response to Salt Stress
Source: MDPI journal article supplement (doi:10.3390/antiox11112225), 2022-11-11

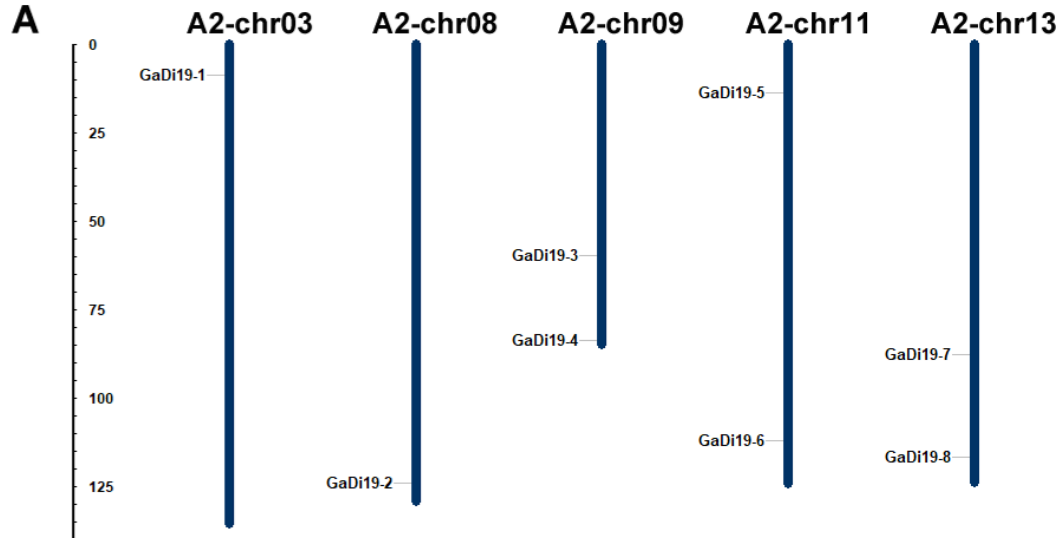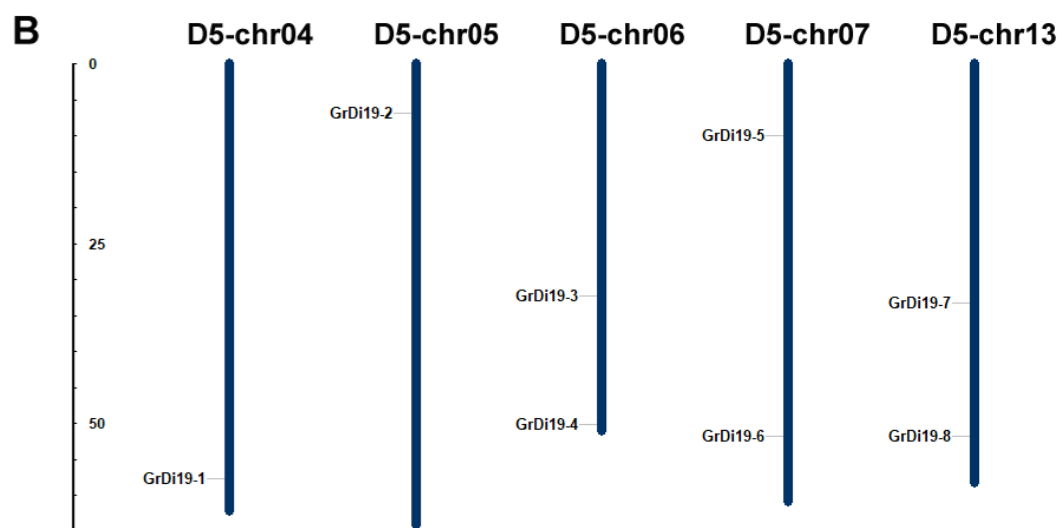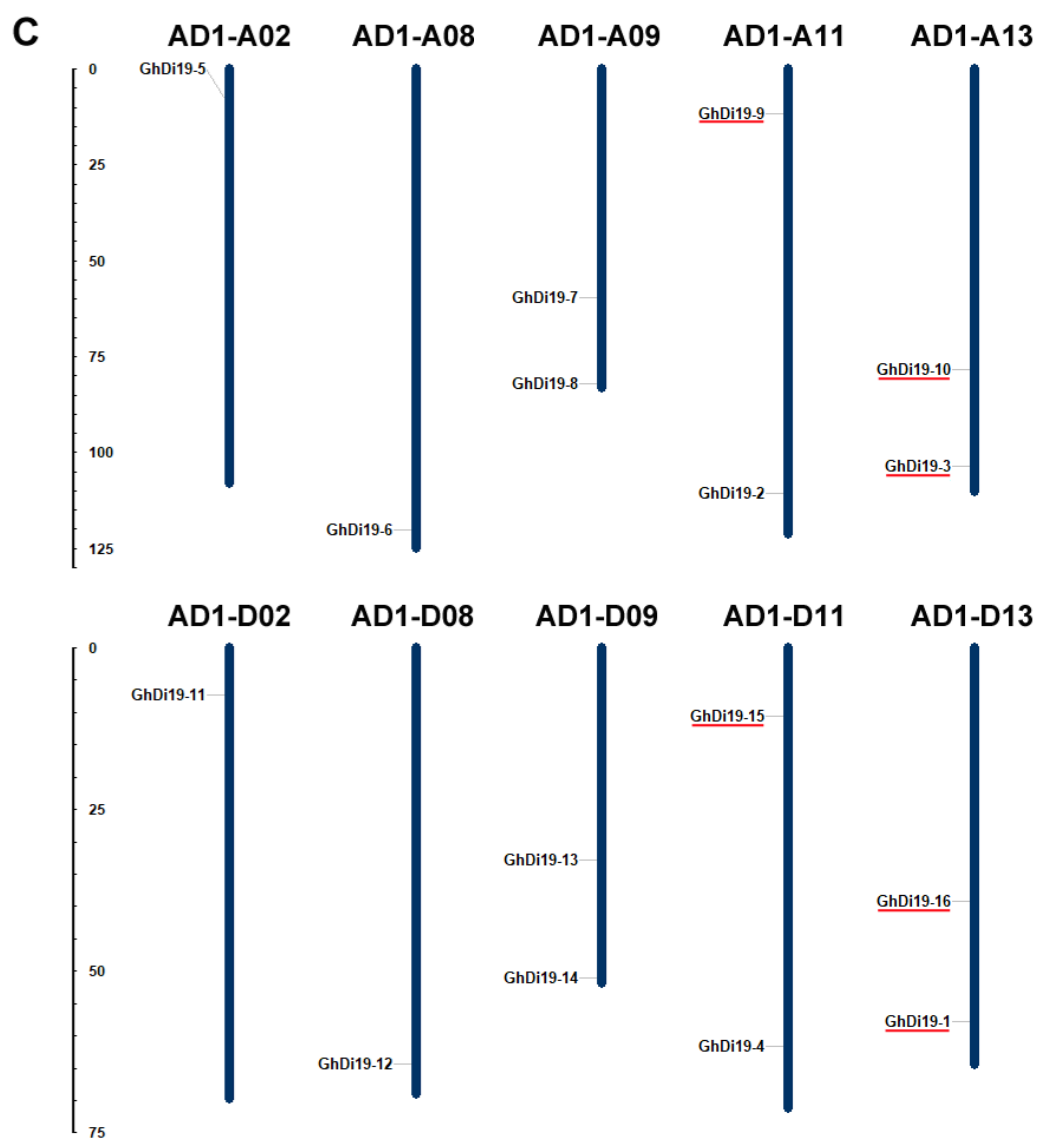

Supplement: s1 [file s1]

A

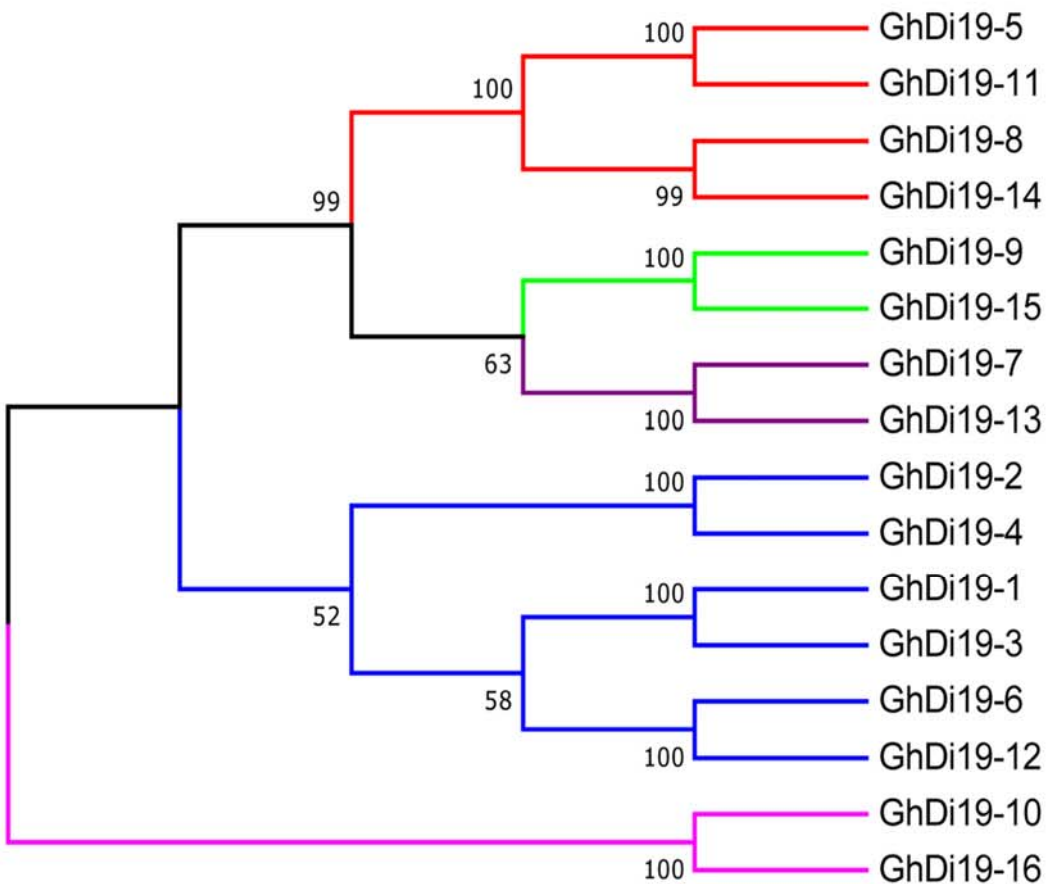

B

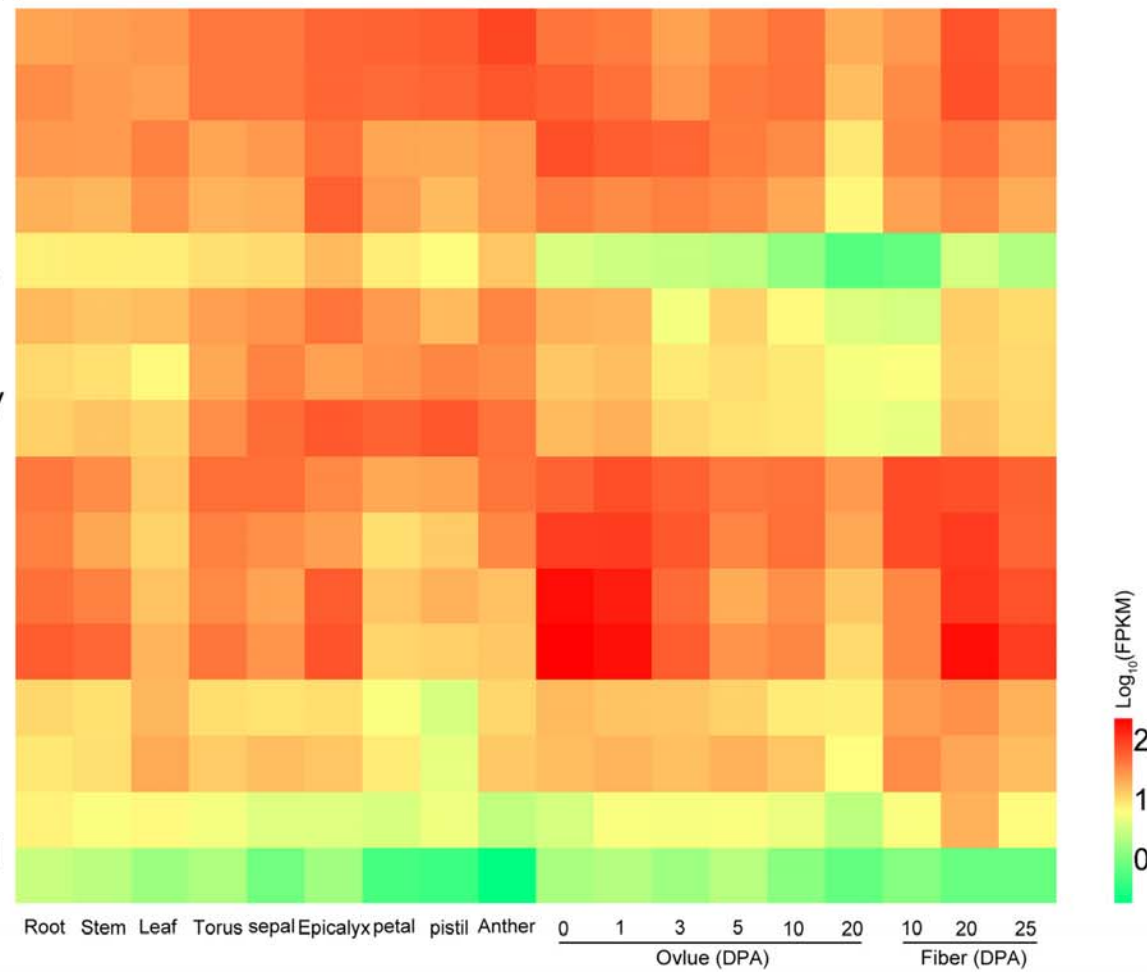

Supplement: s1 [file s1]
